# Supplementary material
Source: Springer Nature journal article supplement (https://www.springermedizin.de/resource/supplementary/12916_2012_695_MOESM1_ESM.pdf/9598554)
Supplement: MOESM1 [file 9598554]

STEP 1:  
Keyword searches in PubMed, Google Scholar, SSNR and Hein Online  
n= 534



STEP 2:  
Identification of relevant publications through title  
and abstract analysis based on inclusion criteria  
n= 29



STEP 3:  
Hand search of the reference lists and bibliographies  
of the 29 articles produced 16 additional relevant  
publications  
n=45



Assessment:  
Full text review of each article  
12 articles excluded  
n=33
